# Supplementary material for: Effectiveness of an Active and Continuous Surveillance Program for Intensive Care Units Infections Based on the EPIC III (Extended Prevalence of Infection in Intensive Care) Approach
Source: MDPI journal article supplement (doi:10.3390/jcm11092482), 2022-04-28
Supplement: s1 [file s1]

Table S1. **(A)**. Characteristics of patients according to the ICU type. **(B)**. Characteristics of infection according to the ICU type.

| (A)                                                      |                    |                         |                   |                              |                              |                              |                             |                     |                                   |                                       |
|----------------------------------------------------------|--------------------|-------------------------|-------------------|------------------------------|------------------------------|------------------------------|-----------------------------|---------------------|-----------------------------------|---------------------------------------|
|                                                          |                    | All patients<br>(n=435) | ICU               |                              |                              |                              |                             |                     |                                   |                                       |
|                                                          |                    |                         | General<br>(n=60) | Cardiosurgic<br>al<br>(n=76) | Traumatolog<br>ic<br>(n=104) | Post-<br>operative<br>(n=82) | Neurosurgic<br>al<br>(n=39) | Pediatric<br>(n=30) | Emergency<br>department<br>(n=26) | Gynecologic/<br>Obstetrical<br>(n=18) |
| Age, year, mean (SD)                                     |                    | 58 (20.6)               | 60 (10.8)         | 63 (10.1)                    | 58 (18.8)                    | 64 (14.2)                    | 63 (16.6)                   | 4 (4.9)             | 67 (12.2)                         | 57 (19.2)                             |
| Male, n (%)                                              |                    | 261 (60.0)              | 43 (71.7)         | 50 (65.8)                    | 71 (68.3)                    | 51 (62.2)                    | 16 (41.0)                   | 16 (53.3)           | 14 (53.8)                         | 0 (0)                                 |
| Type of admission, n (%)                                 | Medical            | 120 (27.6)              | 39 (65.0)         | 8 (10.5)                     | 30 (28.8)                    | 8 (9.8)                      | 11 (28.2)                   | 15 (50.0)           | 7 (26.9)                          | 2 (11.1)                              |
|                                                          | Surgical election  | 158 (36.3)              | 10 (16.7)         | 56 (73.7)                    | 9 (8.7)                      | 54 (65.9)                    | 5 (12.8)                    | 10 (33.3)           | 1 (3.8)                           | 13 (72.2)                             |
|                                                          | Surgical emergency | 105 (24.1)              | 9 (15.0)          | 12 (15.8)                    | 17 (16.3)                    | 20 (24.4)                    | 22 (56.4)                   | 4 (13.3)            | 18 (69.2)                         | 3 (16.7)                              |
|                                                          | Trauma             | 52 (12.0)               | 2 (3.3)           | 0 (0)                        | 48 (46.2)                    | 0 (0)                        | 1 (2.6)                     | 1 (3.3)             | 0 (0)                             | 0 (0)                                 |
| Reason for admission, n (%)                              | Respiratory        | 57 (13.1)               | 29 (48.3)         | 4 (5.3)                      | 10 (9.6)                     | 2 (2.4)                      | 0 (0)                       | 11 (36.7)           | 1 (3.8)                           | 0 (0)                                 |
|                                                          | Cardiovascular     | 55 (12.6)               | 16 (26.7)         | 15 (19.7)                    | 4 (3.8)                      | 9 (11.0)                     | 1 (2.6)                     | 1 (3.3)             | 9 (34.6)                          | 0 (0)                                 |
|                                                          | Neurological       | 80 (18.4)               | 8 (13.3)          | 1 (1.3)                      | 16 (15.4)                    | 8 (9.8)                      | 37 (94.9)                   | 5 (16.7)            | 5 (19.2)                          | 0 (0)                                 |
|                                                          | Trauma             | 57 (13.1)               | 2 (3.3)           | 0 (0)                        | 54 (51.9)                    | 0 (0)                        | 0 (0)                       | 0 (0)               | 1 (3.8)                           | 0 (0)                                 |
|                                                          | Surveillance       | 154 (35.4)              | 4 (6.7)           | 55 (72.4)                    | 11 (10.6)                    | 56 (68.3)                    | 0 (0)                       | 13 (43.3)           | 1 (3.8)                           | 14 (77.8)                             |
|                                                          | Other              | 32 (7.4)                | 1 (1.7)           | 1 (1.3)                      | 9 (8.7)                      | 7 (8.5)                      | 1 (2.6)                     | 0 (0)               | 9 (34.6)                          | 4 (22.2)                              |
| Comorbidities, yes, n (%)                                |                    | 274 (63.0)              | 41 (68.3)         | 62 (81.6)                    | 38 (36.5)                    | 74 (90.2)                    | 21 (53.8)                   | 7 (23.3)            | 18 (69.2)                         | 13 (72.2)                             |
| SOFA, mean (SD) <sup>a</sup>                             |                    | 5 (4.1)                 | 6 (3.9)           | 7 (4.6)                      | 4 (4.1)                      | 4 (3.0)                      | 6 (2.9)                     | 6 (0)               | 9 (4.4)                           | 1 (1.2)                               |
| Invasive ventilation, n (%)                              |                    | 217 (49.9)              | 39 (65.0)         | 51 (67.1)                    | 47 (45.2)                    | 19 (23.2)                    | 22 (56.4)                   | 16 (53.3)           | 23 (88.5)                         | 0 (0)                                 |
| Non-invasive ventilation, n (%)                          |                    | 35 (8.0)                | 5 (8.3)           | 8 (10.5)                     | 3 (2.9)                      | 7 (8.5)                      | 1 (2.6)                     | 6 (20.0)            | 0 (0)                             | 5 (27.8)                              |
| Tracheostomy, n (%)                                      |                    | 114 (26.2)              | 16 (26.7)         | 16 (21.1)                    | 45 (43.3)                    | 9 (11.0)                     | 25 (64.1)                   | 1 (3.3)             | 2 (7.7)                           | 0 (0)                                 |
| Vasopressor use, n (%)                                   |                    | 114 (26.2)              | 15 (25.0)         | 46 (60.5)                    | 15 (14.4)                    | 11 (13.4)                    | 10 (25.6)                   | 2 (6.7)             | 15 (57.7)                         | 0 (0)                                 |
| CVC, n (%)                                               |                    | 372 (85.5)              | 52 (86.7)         | 73 (96.1)                    | 92 (88.5)                    | 71 (86.6)                    | 33 (84.6)                   | 17 (56.7)           | 25 (96.2)                         | 9 (50.0)                              |
| Urinary catheter, n (%)                                  |                    | 407 (93.6)              | 54 (90.0)         | 74 (97.4)                    | 96 (92.3)                    | 76 (92.7)                    | 37 (94.9)                   | 26 (86.7)           | 26 (100.0)                        | 18 (100.0)                            |
| Renal replacement therapy, n (%)                         |                    | 39 (9.0)                | 13 (21.7)         | 13 (17.1)                    | 4 (3.8)                      | 5 (6.1)                      | 1 (2.6)                     | 2 (6.7)             | 1 (3.8)                           | 0 (0)                                 |
| ECMO, n (%)                                              |                    | 8 (1.8)                 | 5 (8.3)           | 3 (3.9)                      | 0 (0)                        | 0 (0)                        | 0 (0)                       | 0 (0)               | 0 (0)                             | 0 (0)                                 |
| Septic shock, n (%)                                      |                    | 69 (15.9)               | 14 (23.3)         | 23 (30.3)                    | 9 (8.7)                      | 4 (4.9)                      | 7 (17.9)                    | 0 (0)               | 12 (46.2)                         | 0 (0)                                 |
| Hyperlactacidemia, n (%)                                 |                    | 77 (17.7)               | 5 (8.3)           | 32 (42.1)                    | 4 (3.8)                      | 18 (22.0)                    | 0 (0)                       | 2 (6.7)             | 13 (50.0)                         | 3 (16.7)                              |
| ICU length of stay, days, median (IQR) <sup>a</sup>      |                    | 14 (4-36)               | 21 (4-57)         | 7 (2-31)                     | 26 (10-32)                   | 4 (1-9)                      | 26 (10-39)                  | 8 (2-15)            | 7 (0-21)                          | 4 (2-5)                               |
| Hospital length of stay, days, median (IQR) <sup>a</sup> |                    | 29 (15-54)              | 53 (28-72)        | 27 (15-49)                   | 58 (36-68)                   | 21 (11-43)                   | 50 (18-57)                  | 36 (15-62)          | 34 (11-44)                        | 11 (7-18)                             |
| Mortality at 60 days, n (%) <sup>a</sup>                 |                    | 52 (12.9)               | 10 (18.2)         | 11 (15.7)                    | 11 (11.1)                    | 6 (7.5)                      | 1 (2.9)                     | 2 (7.4)             | 10 (47.6)                         | 1 (5.9)                               |
| (B)                                                      |                    |                         |                   |                              |                              |                              |                             |                     |                                   |                                       |
|                                                          |                    | All patients            | ICU               |                              |                              |                              |                             |                     |                                   |                                       |

|                               |                                          | (n=435)    | General<br>(n=60) | Cardiosurgic<br>al<br>(n=76) | Traumatologic<br>ic<br>(n=104) | Post-<br>operative<br>(n=82) | Neurosurgic<br>al<br>(n=39) | Pediatric<br>(n=30) | Emergency<br>department<br>(n=26) | Gynecologic/<br>Obstetrical<br>(n=18) |
|-------------------------------|------------------------------------------|------------|-------------------|------------------------------|--------------------------------|------------------------------|-----------------------------|---------------------|-----------------------------------|---------------------------------------|
| Infection, n (%)              |                                          | 184 (42.3) | 47 (78.3)         | 31 (40.8)                    | 42 (40.4)                      | 15 (18.3)                    | 21 (53.8)                   | 12 (40.0)           | 15 (57.7)                         | 1 (5.6)                               |
| Antibiotic prophylaxis, n (%) |                                          | 149 (34.3) | 6 (10.0)          | 38 (50.0)                    | 9 (8.7)                        | 58 (70.7)                    | 4 (10.3)                    | 10 (33.3)           | 8 (30.8)                          | 16 (88.9)                             |
| Antibiotic therapy, n (%)     |                                          | 162 (37.2) | 39 (65.0)         | 30 (39.5)                    | 34 (32.7)                      | 15 (18.3)                    | 16 (41.0)                   | 12 (40.0)           | 15 (57.7)                         | 1 (5.6)                               |
| Positive Isolates, n (%)      | Gram-positive                            | 34 (7.8)   | 7 (11.7)          | 5 (6.6)                      | 5 (4.8)                        | 5 (6.1)                      | 8 (20.5)                    | 3 (10.0)            | 1 (3.8)                           | 0 (0)                                 |
|                               | Gram-positive MS                         | 19 (4.4)   | 2 (3.3)           | 3 (3.9)                      | 3 (2.9)                        | 2 (2.4)                      | 6 (15.4)                    | 3 (10.0)            | 0 (0)                             | 0 (0)                                 |
|                               | Gram-positive MDR                        | 17 (3.9)   | 5 (8.3)           | 2 (2.6)                      | 2 (1.9)                        | 3 (3.7)                      | 4 (10.3)                    | 0 (0)               | 1 (3.8)                           | 0 (0)                                 |
|                               | Gram-negative                            | 98 (22.5)  | 23 (38.3)         | 13 (17.1)                    | 29 (27.9)                      | 10 (12.2)                    | 12 (30.8)                   | 7 (23.3)            | 4 (15.4)                          | 0 (0)                                 |
|                               | Gram-negative MS                         | 69 (15.9)  | 15 (25.0)         | 8 (10.5)                     | 19 (18.3)                      | 6 (7.3)                      | 12 (30.8)                   | 7 (23.3)            | 2 (7.7)                           | 0 (0)                                 |
|                               | Gram-negative MDR                        | 47 (10.8)  | 14 (23.3)         | 8 (10.5)                     | 16 (15.4)                      | 6 (7.3)                      | 1 (2.6)                     | 0 (0)               | 2 (7.7)                           | 0 (0)                                 |
|                               | All MDR bacteria                         | 59 (13.6)  | 16 (26.7)         | 10 (13.2)                    | 18 (17.3)                      | 7 (8.5)                      | 5 (12.8)                    | 0 (0)               | 3 (11.5)                          | 0 (0)                                 |
|                               | Fungi                                    | 19 (4.4)   | 11 (18.3)         | 1 (1.3)                      | 3 (2.9)                        | 2 (2.4)                      | 1 (2.6)                     | 0 (0)               | 1 (3.8)                           | 0 (0)                                 |
|                               | Viruses                                  | 8 (1.8)    | 4 (6.7)           | 1 (1.3)                      | 1 (1.0)                        | 1 (1.2)                      | 0 (0)                       | 1 (3.3)             | 0 (0)                             | 0 (0)                                 |
|                               | <i>Klebsiella</i>                        | 40 (9.2)   | 12 (20.0)         | 8 (10.5)                     | 10 (9.6)                       | 5 (6.1)                      | 1 (2.6)                     | 2 (6.7)             | 2 (7.7)                           | 0 (0)                                 |
|                               | <i>Pseudomonas</i>                       | 30 (6.9)   | 12 (20.0)         | 2 (2.6)                      | 10 (9.6)                       | 2 (2.4)                      | 2 (5.1)                     | 1 (3.3)             | 1 (3.8)                           | 0 (0)                                 |
|                               | <i>Acinetobacter</i>                     | 16 (3.7)   | 2 (3.3)           | 2 (2.6)                      | 8 (7.7)                        | 1 (1.2)                      | 3 (7.7)                     | 0 (0)               | 0 (0)                             | 0 (0)                                 |
|                               | Bacteria resistant to Carbapenems        | 36 (8.3)   | 11 (18.3)         | 6 (7.9)                      | 13 (12.5)                      | 5 (6.1)                      | 0 (0)                       | 0 (0)               | 1 (3.8)                           | 0 (0)                                 |
| Site of infection, n (%)      | Respiratory system                       | 114 (26.2) | 30 (50.0)         | 21 (27.6)                    | 20 (19.2)                      | 12 (14.6)                    | 20 (51.3)                   | 6 (20.0)            | 5 (19.2)                          | 0 (0)                                 |
|                               | Abdomen                                  | 21 (4.8)   | 8 (13.3)          | 0 (0)                        | 2 (1.9)                        | 2 (2.4)                      | 0 (0)                       | 1 (3.3)             | 8 (30.8)                          | 0 (0)                                 |
|                               | Circulation                              | 69 (15.9)  | 20 (33.3)         | 17 (22.4)                    | 17 (16.3)                      | 5 (6.1)                      | 1 (2.6)                     | 3 (10.0)            | 6 (23.1)                          | 0 (0)                                 |
|                               | Kidney/genitourinary                     | 17 (3.9)   | 6 (10.0)          | 0 (0)                        | 4 (3.8)                        | 1 (1.2)                      | 4 (10.3)                    | 1 (3.3)             | 0 (0)                             | 1 (5.6)                               |
|                               | Others                                   | 26 (6.0)   | 6 (10.0)          | 1 (1.3)                      | 14 (13.5)                      | 2 (2.4)                      | 0 (0)                       | 3 (10.0)            | 0 (0)                             | 0 (0)                                 |
| Acquisition mode, n (%)       | Community-acquired                       | 36 (8.3)   | 16 (26.7)         | 3 (3.9)                      | 4 (3.8)                        | 2 (2.4)                      | 0 (0)                       | 6 (20.0)            | 5 (19.2)                          | 0 (0)                                 |
|                               | Hospital-acquired/Health Care-associated | 41 (9.4)   | 6 (10.0)          | 5 (6.6)                      | 9 (8.7)                        | 5 (6.1)                      | 6 (15.4)                    | 3 (10.0)            | 6 (23.1)                          | 1 (5.6)                               |
|                               | ICU-acquired                             | 117 (26.9) | 25 (41.7)         | 23 (30.3)                    | 34 (32.7)                      | 11 (13.4)                    | 16 (41.0)                   | 4 (13.3)            | 4 (15.4)                          | 0 (0)                                 |
| Evidence of Infection, n (%)  | Certain                                  | 108 (24.8) | 31 (51.7)         | 15 (19.7)                    | 35 (33.7)                      | 9 (11.0)                     | 6 (15.4)                    | 8 (26.7)            | 4 (15.4)                          | 0 (0)                                 |
|                               | Probable                                 | 44 (10.1)  | 11 (18.3)         | 11 (14.5)                    | 5 (4.8)                        | 5 (6.1)                      | 4 (10.3)                    | 1 (3.3)             | 7 (26.9)                          | 0 (0)                                 |
|                               | Feasible                                 | 52 (12.0)  | 8 (13.3)          | 8 (10.5)                     | 9 (8.7)                        | 4 (4.9)                      | 14 (35.9)                   | 3 (10.0)            | 5 (19.2)                          | 1 (5.6)                               |

CVC: central venous catheter; ECMO: Extracorporeal membrane oxygenation; ICU: Intensive care unit; IQR: interquartile range; SD: standard deviation; SOFA: Sequential Organ Failure Assessment score; MDR: multi-drug resistant; MS: multi-sensitive. \* Significant at 5% level; <sup>a</sup> Total patients is not 435 because of missing values. Percentages are calculated considering missing values. Percentages can exceed 100% because patients could have more than one infection.
