# Supplementary material for: Effectiveness of an Active and Continuous Surveillance Program for Intensive Care Units Infections Based on the EPIC III (Extended Prevalence of Infection in Intensive Care) Approach
Source: MDPI journal article supplement (doi:10.3390/jcm11092482), 2022-04-28
Supplement: s1 [file s1]

# STUDIO SPRINT - CFR

STUDY DAY -- \_\_/\_\_/\_\_

ICU ☐ general ☐ cardiosurg ☐ traumatologic ☐ post-op ☐ neurosurg ☐ pediatric ☐ emergency dept. ☐ gyn/obst

Patient ID num hospital admission \_\_/\_\_/\_\_ ICU admission \_\_/\_\_/\_\_  
 Initials Age ☐ male ☐ female Weight Height

Admission Type ☐ medical ☐ surgical election ☐ surgical emergency ☐ trauma

Origin ☐ other hospital ☐ DEA ☐ medical dept. ☐ surgical dept. ☐ other

Reason for Adm ☐ respiratory ☐ cardiovascular ☐ neurological ☐ trauma ☐ surveillance ☐ other

Main Diagnosis

Other Diagnosis

|               |                                                               |                                                               |                                                          |                                                           |                                                   |                                                     |
|---------------|---------------------------------------------------------------|---------------------------------------------------------------|----------------------------------------------------------|-----------------------------------------------------------|---------------------------------------------------|-----------------------------------------------------|
| Comorbidities | <input type="checkbox"/> active solid cancer                  | <input type="checkbox"/> inactive solid cancer (<5y)          | <input type="checkbox"/> inactive solid cancer (>5y)     | <input type="checkbox"/> metastatic cancer                | <input type="checkbox"/> lymphoma                 | <input type="checkbox"/> other hematological cancer |
|               | <input type="checkbox"/> immunosuppressive therapy (<3months) | <input type="checkbox"/> immunosuppressive therapy (>3months) | <input type="checkbox"/> chronic kidney failure          | <input type="checkbox"/> COPD                             | <input type="checkbox"/> heart failure (NYHA 3-4) | <input type="checkbox"/> previous cardiac disease   |
|               | <input type="checkbox"/> solid organ transplantation          | <input type="checkbox"/> neurodegenerative disease            | <input type="checkbox"/> IDDM                            | <input type="checkbox"/> NIDDM                            | <input type="checkbox"/> chronic dialysis         | <input type="checkbox"/> cirrhosis (CHILD B-C)      |
|               | <input type="checkbox"/> CT/RT (<6months)                     | <input type="checkbox"/> CT/RT (>6months)                     | <input type="checkbox"/> allogenic stem cells transplant | <input type="checkbox"/> autologous stem cells transplant | <input type="checkbox"/> HIV infection            |                                                     |

|           |     |     |          |     |     |
|-----------|-----|-----|----------|-----|-----|
| Temp (°C) | min | max | HR (bpm) | min | max |
|-----------|-----|-----|----------|-----|-----|

|            |     |     |            |     |     |
|------------|-----|-----|------------|-----|-----|
| SBP (mmHg) | min | max | MAP (mmHg) | min | max |
|------------|-----|-----|------------|-----|-----|

|                                                                                           |    |                   |
|-------------------------------------------------------------------------------------------|----|-------------------|
| <b>Vasopressors/Inotropes</b><br><input type="checkbox"/> yes <input type="checkbox"/> no | 1. | Dose (mcg/kg/min) |
|                                                                                           | 2. | Dose (mcg/kg/min) |
|                                                                                           | 3. | Dose (mcg/kg/min) |
|                                                                                           | 4. | Dose (mcg/kg/min) |

|             |                                                                                                |           |     |     |
|-------------|------------------------------------------------------------------------------------------------|-----------|-----|-----|
| Respiratory | <input type="checkbox"/> spontaneous breathing <input type="checkbox"/> mechanical ventilation | RR (/min) | min | max |
|-------------|------------------------------------------------------------------------------------------------|-----------|-----|-----|

|    |     |     |                         |     |     |                          |     |     |
|----|-----|-----|-------------------------|-----|-----|--------------------------|-----|-----|
| pH | min | max | PaO <sub>2</sub> (mmHg) | min | max | PaCO <sub>2</sub> (mmHg) | min | max |
|----|-----|-----|-------------------------|-----|-----|--------------------------|-----|-----|

|                           |     |     |                      |     |     |                                    |     |     |
|---------------------------|-----|-----|----------------------|-----|-----|------------------------------------|-----|-----|
| HCO <sub>3</sub> (mmol/l) | min | max | FiO <sub>2</sub> (%) | min | max | PaO <sub>2</sub> /FiO <sub>2</sub> | min | max |
|---------------------------|-----|-----|----------------------|-----|-----|------------------------------------|-----|-----|

|                                         |     |     |           |     |     |                                          |     |     |
|-----------------------------------------|-----|-----|-----------|-----|-----|------------------------------------------|-----|-----|
| WBC (10 <sup>3</sup> /mm <sup>3</sup> ) | min | max | Hb (g/dl) | min | max | PLTS (10 <sup>3</sup> /mm <sup>3</sup> ) | min | max |
|-----------------------------------------|-----|-----|-----------|-----|-----|------------------------------------------|-----|-----|

|         |     |     |              |     |     |              |     |     |
|---------|-----|-----|--------------|-----|-----|--------------|-----|-----|
| Hct (%) | min | max | Crea (mg/dl) | min | max | Lac (mmol/l) | min | max |
|---------|-----|-----|--------------|-----|-----|--------------|-----|-----|

|                          |     |     |                         |     |     |  |  |  |
|--------------------------|-----|-----|-------------------------|-----|-----|--|--|--|
| Na <sup>+</sup> (mmol/l) | min | max | K <sup>+</sup> (mmol/l) | min | max |  |  |  |
|--------------------------|-----|-----|-------------------------|-----|-----|--|--|--|

|                    |     |              |     |                         |  |
|--------------------|-----|--------------|-----|-------------------------|--|
| Bilirubine (mg/dl) | max | Urea (mg/dl) | max | Urinary Output (ml/24h) |  |
|--------------------|-----|--------------|-----|-------------------------|--|

|     |                   |     |   |   |   |       |  |
|-----|-------------------|-----|---|---|---|-------|--|
| GCS | during sedation   | EVM | E | V | M | SOFA  |  |
|     | neurologic window | EVM | E | V | M | SOFAq |  |

|                      |                                                          |                     |              |                                                          |               |
|----------------------|----------------------------------------------------------|---------------------|--------------|----------------------------------------------------------|---------------|
| Invasive ventilation | <input type="checkbox"/> yes <input type="checkbox"/> no | start date __/__/__ | Tracheostomy | <input type="checkbox"/> yes <input type="checkbox"/> no | date __/__/__ |
|----------------------|----------------------------------------------------------|---------------------|--------------|----------------------------------------------------------|---------------|

|          |                                                          |                     |                  |                                                          |               |
|----------|----------------------------------------------------------|---------------------|------------------|----------------------------------------------------------|---------------|
| CPAP/NIV | <input type="checkbox"/> yes <input type="checkbox"/> no | start date __/__/__ | Coaxial catheter | <input type="checkbox"/> yes <input type="checkbox"/> no | date __/__/__ |
|----------|----------------------------------------------------------|---------------------|------------------|----------------------------------------------------------|---------------|

|                         |                                                          |                     |                  |                                                          |               |
|-------------------------|----------------------------------------------------------|---------------------|------------------|----------------------------------------------------------|---------------|
| HF nasal O <sub>2</sub> | <input type="checkbox"/> yes <input type="checkbox"/> no | start date __/__/__ | Urinary catheter | <input type="checkbox"/> yes <input type="checkbox"/> no | date __/__/__ |
|-------------------------|----------------------------------------------------------|---------------------|------------------|----------------------------------------------------------|---------------|

|      |                                                          |                     |     |                                                          |               |
|------|----------------------------------------------------------|---------------------|-----|----------------------------------------------------------|---------------|
| ECMO | <input type="checkbox"/> yes <input type="checkbox"/> no | start date __/__/__ | DVE | <input type="checkbox"/> yes <input type="checkbox"/> no | date __/__/__ |
|------|----------------------------------------------------------|---------------------|-----|----------------------------------------------------------|---------------|

|       |                                                          |               |        |      |
|-------|----------------------------------------------------------|---------------|--------|------|
| CVC_1 | <input type="checkbox"/> yes <input type="checkbox"/> no | date __/__/__ | lumens | site |
|-------|----------------------------------------------------------|---------------|--------|------|

|       |                                                          |               |        |      |
|-------|----------------------------------------------------------|---------------|--------|------|
| CVC_2 | <input type="checkbox"/> yes <input type="checkbox"/> no | date __/__/__ | lumens | site |
|-------|----------------------------------------------------------|---------------|--------|------|

|                           |                                                          |      |                                                          |
|---------------------------|----------------------------------------------------------|------|----------------------------------------------------------|
| Intermittent hemodialysis | <input type="checkbox"/> yes <input type="checkbox"/> no | CRRT | <input type="checkbox"/> yes <input type="checkbox"/> no |
|---------------------------|----------------------------------------------------------|------|----------------------------------------------------------|

|              |                                                          |                   |                                                          |
|--------------|----------------------------------------------------------|-------------------|----------------------------------------------------------|
| Septic Shock | <input type="checkbox"/> yes <input type="checkbox"/> no | Hyperlactacidemia | <input type="checkbox"/> yes <input type="checkbox"/> no |
|--------------|----------------------------------------------------------|-------------------|----------------------------------------------------------|

| INFECTION SECTION                                                        |                                             |                                          |
|--------------------------------------------------------------------------|---------------------------------------------|------------------------------------------|
| ATB prophylaxis <input type="checkbox"/> yes <input type="checkbox"/> no | 1.                                          |                                          |
|                                                                          | 2.                                          |                                          |
|                                                                          | 3.                                          |                                          |
| <input type="checkbox"/> GE decontamination                              | <input type="checkbox"/> oral Chlorhexidine | <input type="checkbox"/> nasal Mupirocin |

| INFECTION 1 <input type="checkbox"/> yes <input type="checkbox"/> no      |                                             |                                                                   |                                         |                                       |                               |
|---------------------------------------------------------------------------|---------------------------------------------|-------------------------------------------------------------------|-----------------------------------------|---------------------------------------|-------------------------------|
| Site                                                                      | <input type="checkbox"/> respiratory system | <input type="checkbox"/> abdomen                                  | <input type="checkbox"/> circulation    | <input type="checkbox"/> kidneys      | <input type="checkbox"/> skin |
|                                                                           | <input type="checkbox"/> CNS                | <input type="checkbox"/> catheter-related                         | <input type="checkbox"/> genito-urinary | <input type="checkbox"/> other        |                               |
| Evidence <sup>1</sup>                                                     | <input type="checkbox"/> certain            |                                                                   | <input type="checkbox"/> probable       | <input type="checkbox"/> feasible     |                               |
| Acquisition mode <sup>2</sup>                                             | <input type="checkbox"/> community-acquired | <input type="checkbox"/> hospital-acquired/health care-associated |                                         | <input type="checkbox"/> ICU-acquired |                               |
| Positive isolate <input type="checkbox"/> yes <input type="checkbox"/> no | bug 1                                       |                                                                   |                                         |                                       |                               |
|                                                                           | bug 2                                       |                                                                   |                                         |                                       |                               |
|                                                                           | bug 3                                       |                                                                   |                                         |                                       |                               |

| INFECTION 2 <input type="checkbox"/> yes <input type="checkbox"/> no      |                                             |                                                                   |                                         |                                       |                               |
|---------------------------------------------------------------------------|---------------------------------------------|-------------------------------------------------------------------|-----------------------------------------|---------------------------------------|-------------------------------|
| Site                                                                      | <input type="checkbox"/> respiratory system | <input type="checkbox"/> abdomen                                  | <input type="checkbox"/> circulation    | <input type="checkbox"/> kidneys      | <input type="checkbox"/> skin |
|                                                                           | <input type="checkbox"/> CNS                | <input type="checkbox"/> catheter-related                         | <input type="checkbox"/> genito-urinary | <input type="checkbox"/> other        |                               |
| Evidence <sup>1</sup>                                                     | <input type="checkbox"/> certain            |                                                                   | <input type="checkbox"/> probable       | <input type="checkbox"/> feasible     |                               |
| Acquisition mode <sup>2</sup>                                             | <input type="checkbox"/> community-acquired | <input type="checkbox"/> hospital-acquired/health care-associated |                                         | <input type="checkbox"/> ICU-acquired |                               |
| Positive isolate <input type="checkbox"/> yes <input type="checkbox"/> no | bug 1                                       |                                                                   |                                         |                                       |                               |
|                                                                           | bug 2                                       |                                                                   |                                         |                                       |                               |
|                                                                           | bug 3                                       |                                                                   |                                         |                                       |                               |

| INFECTION 3 <input type="checkbox"/> yes <input type="checkbox"/> no      |                                             |                                                                   |                                         |                                       |                               |
|---------------------------------------------------------------------------|---------------------------------------------|-------------------------------------------------------------------|-----------------------------------------|---------------------------------------|-------------------------------|
| Site                                                                      | <input type="checkbox"/> respiratory system | <input type="checkbox"/> abdomen                                  | <input type="checkbox"/> circulation    | <input type="checkbox"/> kidneys      | <input type="checkbox"/> skin |
|                                                                           | <input type="checkbox"/> CNS                | <input type="checkbox"/> catheter-related                         | <input type="checkbox"/> genito-urinary | <input type="checkbox"/> other        |                               |
| Evidence <sup>1</sup>                                                     | <input type="checkbox"/> certain            |                                                                   | <input type="checkbox"/> probable       | <input type="checkbox"/> feasible     |                               |
| Acquisition mode <sup>2</sup>                                             | <input type="checkbox"/> community-acquired | <input type="checkbox"/> hospital-acquired/health care-associated |                                         | <input type="checkbox"/> ICU-acquired |                               |
| Positive isolate <input type="checkbox"/> yes <input type="checkbox"/> no | bug 1                                       |                                                                   |                                         |                                       |                               |
|                                                                           | bug 2                                       |                                                                   |                                         |                                       |                               |
|                                                                           | bug 3                                       |                                                                   |                                         |                                       |                               |

| INFECTION 4 <input type="checkbox"/> yes <input type="checkbox"/> no      |                                             |                                                                   |                                         |                                       |                               |
|---------------------------------------------------------------------------|---------------------------------------------|-------------------------------------------------------------------|-----------------------------------------|---------------------------------------|-------------------------------|
| Site                                                                      | <input type="checkbox"/> respiratory system | <input type="checkbox"/> abdomen                                  | <input type="checkbox"/> circulation    | <input type="checkbox"/> kidneys      | <input type="checkbox"/> skin |
|                                                                           | <input type="checkbox"/> CNS                | <input type="checkbox"/> catheter-related                         | <input type="checkbox"/> genito-urinary | <input type="checkbox"/> other        |                               |
| Evidence <sup>1</sup>                                                     | <input type="checkbox"/> certain            |                                                                   | <input type="checkbox"/> probable       | <input type="checkbox"/> feasible     |                               |
| Acquisition mode <sup>2</sup>                                             | <input type="checkbox"/> community-acquired | <input type="checkbox"/> hospital-acquired/health care-associated |                                         | <input type="checkbox"/> ICU-acquired |                               |
| Positive isolate <input type="checkbox"/> yes <input type="checkbox"/> no | bug 1                                       |                                                                   |                                         |                                       |                               |
|                                                                           | bug 2                                       |                                                                   |                                         |                                       |                               |
|                                                                           | bug 3                                       |                                                                   |                                         |                                       |                               |

|                                                                                           |    |
|-------------------------------------------------------------------------------------------|----|
| ATB therapy <input type="checkbox"/> yes <input type="checkbox"/> no                      | 1. |
|                                                                                           | 2. |
|                                                                                           | 3. |
|                                                                                           | 4. |
|                                                                                           | 5. |
| ATB therapy for recent infection <input type="checkbox"/> yes <input type="checkbox"/> no |    |

| FOLLOW UP                         |                             |                                                              |                                            |                                     |                               |                                |
|-----------------------------------|-----------------------------|--------------------------------------------------------------|--------------------------------------------|-------------------------------------|-------------------------------|--------------------------------|
| Dismissal                         | ICU dismissal    __/__/____ |                                                              |                                            | hospital dismissal    __/__/____    |                               |                                |
|                                   | ICU Dismissal to            | <input type="checkbox"/> other ICU                           | <input type="checkbox"/> intermediate unit | <input type="checkbox"/> department | <input type="checkbox"/> dead | <input type="checkbox"/> other |
| Hospital dismissal before 60 days |                             | <input type="checkbox"/> yes <input type="checkbox"/> no     |                                            |                                     |                               |                                |
| Outcome at 60 days                |                             | <input type="checkbox"/> alive <input type="checkbox"/> dead |                                            |                                     |                               |                                |

| BUG legenda |                                                                                                                                  |
|-------------|----------------------------------------------------------------------------------------------------------------------------------|
| 100         | gram positivi                                                                                                                    |
| 101         | staphylococcus aureus, sensibilità/resistenza non nota                                                                           |
| 102         | staphylococcus aureus sensibile alla meticillina (MSSA)                                                                          |
| 103         | staphylococcus aureus resistente alla meticillina (MRSA)                                                                         |
| 104         | staphylococcus aureus resistente a linezolid                                                                                     |
| 105         | staphylococcus aureus con resistenza totale o intermedia alla vancomicina (VISA)                                                 |
| 106         | stafilococchi coagulasi-negativi (epidermidis, emolitico,...) sensibilità/resistenza non nota                                    |
| 107         | stafilococchi coagulasi-negativi (epidermidis, emolitico,...) sensibili alla meticillina                                         |
| 108         | stafilococchi coagulasi-negativi (epidermidis, emolitico,...) resistenti alla meticillina                                        |
| 109         | streptococcus gruppo D (enterococcus faecalis, faecium) sensibilità/resistenza non nota                                          |
| 110         | streptococcus gruppo D (enterococcus faecalis, faecium) sensibili alla vancomicina                                               |
| 111         | streptococcus gruppo D (enterococcus faecalis, faecium) resistenza totale o intermedia alla vancomicina (VRE)                    |
| 112         | streptococcus A, B, C, gruppo G                                                                                                  |
| 113         | streptococcus pneumoniae, sensibilità/resistenza non nota                                                                        |
| 114         | streptococcus pneumoniae resistente ai macrolidi                                                                                 |
| 115         | streptococcus pneumoniae sensibile ai macrolidi                                                                                  |
| 116         | streptococcus, altri                                                                                                             |
| 117         | cocchi gram +, altri                                                                                                             |
| 118         | neisseria meningitidis                                                                                                           |
| 119         | moraxella (moraxella catarrhalis, moraxella spp)                                                                                 |
| 120         | listeria monocytogenes                                                                                                           |
| 121         | neisseria gonorrhoeae                                                                                                            |
| 122         | bacilli gram +, altri (bacillus cereus, bacillus spp, corynebacterium spp, lactobacillus, rhodococcus equi, nocardia spp, altro) |
| 200         | gram negativi                                                                                                                    |
| 201         | escherichia coli, sensibilità/resistenza non nota                                                                                |
| 202         | escherichia coli sensibile ai beta-lattamici (tra cui cefalosporine di terza generazione)                                        |
| 203         | escherichia coli resistente ai beta lattamici (tra cui cefalosporine di terza generazione)                                       |
| 204         | escherichia coli resistente ai carbapenemici                                                                                     |
| 205         | enterobacter (di qualsiasi tipo)                                                                                                 |
| 206         | klebsiella, sensibilità/resistenza non nota                                                                                      |
| 207         | klebsiella (qualsiasi tipo) sensibile ai beta-lattamici (tra cui cefalosporine di terza generazione)                             |
| 208         | klebsiella (qualsiasi tipo) resistente ai beta lattamici (tra cui cefalosporine di terza generazione)                            |
| 209         | klebsiella resistente ai carbapenemi                                                                                             |
| 210         | proteus o providencia (qualsiasi tipo)                                                                                           |
| 211         | salmonella (qualsiasi tipo)                                                                                                      |
| 212         | serratia                                                                                                                         |
| 213         | citrobacter                                                                                                                      |
| 214         | pseudomonas aeruginosa, sensibilità/resistenza non nota                                                                          |
| 215         | pseudomonas aeruginosa sensibile ai carbapenemi                                                                                  |
| 216         | pseudomonas aeruginosa sensibile ai beta lattamici (compresa terza generazione di cefalosporine)                                 |
| 217         | pseudomonas aeruginosa resistente ai carbapenemi                                                                                 |
| 218         | pseudomonas aeruginosa resistente ai beta lattamici (tra cui cefalosporine di terza generazione)                                 |
| 219         | pseudomonas, altri                                                                                                               |
| 220         | acinetobacter, sensibilità/resistenza non nota                                                                                   |
| 221         | acinetobacter sensibile ai carbapenemi                                                                                           |
| 222         | acinetobacter resistente ai carbapenemi                                                                                          |
| 223         | stenotrophomonas maltophilia                                                                                                     |
| 224         | campylobacter - helicobacter - brucella                                                                                          |
| 225         | haemophilus (influenzae o altro)                                                                                                 |
| 226         | enterobatteri, altri (yersinia spp, shigella spp, altro)                                                                         |
| 227         | eventuali batteri gram neg resistenti alla colistina                                                                             |
| 228         | gram negativi, altri                                                                                                             |

|     |                                                                                                              |
|-----|--------------------------------------------------------------------------------------------------------------|
| 300 | anaerobi                                                                                                     |
| 301 | clostridium (clostridium difficile, clostridium perfringes, clostridium spp, actinomyces, propionibacterium) |
| 302 | cocchi anaerobi (peptococcus, peptostreptococcus, veillonella)                                               |
| 303 | bacteroidi (bacteroides fragilis, bacteroides melaninogenicus, capnocytophaga, fusobacterium spp,...)        |
| 304 | anaerobi, altri                                                                                              |
| 400 | altri microrganismi                                                                                          |
| 401 | micobatteri (tubercolosi o altri)                                                                            |
| 402 | clamidia                                                                                                     |
| 403 | rickettsia                                                                                                   |
| 404 | mycoplasma (mycoplasma pneumoniae o hominis, rochalimeae spp, bartonella spp)                                |
| 405 | legionella pneumoniae                                                                                        |
| 500 | funghi                                                                                                       |
| 501 | candida albicans, sensibilità/resistenza non nota                                                            |
| 502 | candida albicans, sensibile ad azoli                                                                         |
| 503 | candida albicans, resistente ad azoli                                                                        |
| 504 | candida tropicalis, sensibilità/resistenza non nota                                                          |
| 505 | candida tropicalis, sensibile ad azoli                                                                       |
| 506 | candida tropicalis, resistente ad azoli                                                                      |
| 507 | candida glabrata, sensibilità/resistenza non nota                                                            |
| 508 | candida glabrata, sensibile ad azoli                                                                         |
| 509 | candida glabrata, resistente ad azoli                                                                        |
| 510 | candida krusei, sensibilità/resistenza non nota                                                              |
| 511 | candida krusei, sensibile ad azoli                                                                           |
| 512 | candida krusei, resistente ad azoli                                                                          |
| 513 | candida kefyr, sensibilità/resistenza non nota                                                               |
| 514 | candida kefyr, sensibile ad azoli                                                                            |
| 515 | candida kefyr, resistente ad azoli                                                                           |
| 516 | candida parapsilosis, sensibilità/resistenza non nota                                                        |
| 517 | candida parapsilosis, sensibile ad azoli                                                                     |
| 518 | candida parapsilosis, resistente ad azoli                                                                    |
| 519 | candida guilliermondii, sensibilità/resistenza non nota                                                      |
| 520 | candida guilliermondii, sensibile ad azoli                                                                   |
| 521 | candida guilliermondii, resistente ad azoli                                                                  |
| 522 | candida dubliniensis, sensibilità/resistenza non nota                                                        |
| 523 | candida dubliniensis, sensibile ad azoli                                                                     |
| 524 | candida dubliniensis, resistente ad azoli                                                                    |
| 525 | aspergillus                                                                                                  |
| 526 | funghi, altri (cryptococcus neoformans, histoplasma spp,...)                                                 |
| 600 | virus                                                                                                        |
| 601 | influenza A                                                                                                  |
| 602 | influenza B                                                                                                  |
| 603 | HSV I o II                                                                                                   |
| 604 | CMV                                                                                                          |
| 605 | altri                                                                                                        |
| 700 | parassiti                                                                                                    |
| 701 | plasmodium falciparum, pneumocystis carinii, toxoplasma gondii,...                                           |
| 801 | flora mista                                                                                                  |

## ANTIMICROBIAL LEGEND

|    |                           |
|----|---------------------------|
| 10 | cefalosporine             |
| 11 | cefazolina                |
| 12 | cefuroxime                |
| 13 | ceftazidime               |
| 14 | ceftriaxone               |
| 15 | cefepime/cefpirome        |
| 16 | altra cefalosporina       |
| 20 | penicilline               |
| 21 | benzil penicillina        |
| 22 | ampicillina               |
| 23 | amoxyc + clavulanato      |
| 24 | pipera + tazo             |
| 25 | oxa/cloxa/flucloxacillina |
| 26 | altra penicillina         |
| 30 | carbapenemi               |
| 31 | imipenem                  |
| 32 | meropenem                 |
| 33 | ertapenem                 |
| 34 | doripenem                 |
| 35 | altro carbapeneme         |
| 40 | altri beta-lattami        |
| 41 | temocillin                |
| 42 | aztreonam                 |
| 43 | altri                     |
| 50 | aminoglicosidi            |
| 51 | amikacina                 |
| 52 | tobramicina               |
| 53 | gentamicina               |
| 54 | altro aminoglicoside      |

|     |                                      |
|-----|--------------------------------------|
| 60  | chinoloni                            |
| 61  | ciprofloxacina                       |
| 62  | levofloxacina                        |
| 63  | altro chinolone                      |
| 70  | glicopeptidi                         |
| 71  | vancomicina                          |
| 72  | teicoplanina                         |
| 73  | altro glicopeptide                   |
| 80  | macrolidi                            |
| 81  | eritromicina                         |
| 82  | altro macrolide                      |
| 90  | altri antibiotici                    |
| 91  | metronidazolo                        |
| 92  | cotrimoxazolo                        |
| 93  | linezolid                            |
| 94  | daptomicina                          |
| 95  | tigeciclina                          |
| 96  | altri antibiotici                    |
| 100 | antifungini                          |
| 101 | fluconazolo                          |
| 102 | amfotericina B                       |
| 103 | amfotericina B formulazione lipidica |
| 104 | echinocandine                        |
| 105 | voriconazolo                         |
| 106 | altri antifungini                    |
| 200 | farmaci antivirali                   |
| 201 | HAART                                |
| 202 | oseltamivir                          |
| 203 | zanamivir                            |
| 204 | aciclovir                            |
| 205 | ganciclovir                          |
| 206 | amantadina                           |
| 207 | altri antivirali                     |

<sup>1</sup> **Evidence of infection:** infections are considered ‘definite’, ‘probable’, or ‘possible’, according to the International Sepsis Forum Consensus Conference definitions.

<sup>2</sup> **Acquisition mode:** infections occurring at least 48h after hospital admission are considered ‘hospital-acquired/health care-associated’; infections occurring at least 24h after ICU admission are considered ‘ICU-acquired’; all other infections are considered ‘community-acquired’, according to the ECDC definitions.
